# Supplementary material for: Cardiovascular Surgical Emergencies in France, before, during and after the First Lockdown for COVID-19 in 2020: A Comparative Nationwide Retrospective Cohort Study
Source: MDPI journal article supplement (doi:10.3390/life11111245), 2021-11-16
Supplement: s1 [file s1]

Supplementary Material

# Cardiovascular Surgical Emergencies in France, before, during and after the First Lockdown for COVID-19 in 2020: A Comparative Nationwide Retrospective Cohort Study

**Table S1.** Monthly hospitalizations for cardiovascular surgical emergencies in France from January to September 2017 to 2019 (mean) and 2020.

|                                        | Year       | January      | February    | March        | April        | May          | June         | July         | August       | September    |
|----------------------------------------|------------|--------------|-------------|--------------|--------------|--------------|--------------|--------------|--------------|--------------|
| Complications of myocardial infarction | 2017–2019* | 50 (9.4)     | 37 (4.3)    | 54 (6.1)     | 46 (2.6)     | 40 (2.1)     | 38 (7.5)     | 39 (2.5)     | 42 (1.9)     | 39 (5.0)     |
|                                        | 2020       | 58           | 45          | 41           | 48           | 42           | 51           | 41           | 36           | 36           |
| Use of circulatory assistance          | 2017–2019* | 285 (24.1)   | 251 (10.0)  | 284 (12.3)   | 254 (18.3)   | 264 (13.6)   | 256 (4.2)    | 222 (21.1)   | 217 (19.6)   | 217 (10.2)   |
|                                        | 2020       | 282          | 224         | 476          | 350          | 250          | 211          | 188          | 192          | 246          |
| Heart transplantation                  | 2017–2019* | 33 (1.3)     | 26 (1.7)    | 34 (4.9)     | 29 (2.9)     | 41 (5.7)     | 39 (6.9)     | 35 (5.4)     | 35 (6.6)     | 33 (3.9)     |
|                                        | 2020       | 32           | 22          | 29           | 26           | 34           | 29           | 28           | 26           | 22           |
| Aortic dissection                      | 2017–2019* | 431 (34.7)   | 386 (16.2)  | 455 (21.1)   | 417 (22.2)   | 403 (31.3)   | 385 (37.1)   | 352 (12.3)   | 318 (5.7)    | 393 (39.6)   |
|                                        | 2020       | 479          | 471         | 369          | 315          | 340          | 403          | 341          | 332          | 432          |
| Aortic aneurysm rupture                | 2017–2019* | 215 (7.8)    | 184 (12.0)  | 221 (19.4)   | 191 (6.0)    | 177 (12.0)   | 165 (7.9)    | 165 (11.2)   | 157 (10.3)   | 187 (2.2)    |
|                                        | 2020       | 228          | 216         | 180          | 130          | 169          | 200          | 159          | 159          | 206          |
| Acute limb ischemia                    | 2017–2019* | 6621 (448.4) | 6172 (83.2) | 6844 (106.8) | 6165 (165.9) | 6304 (211.5) | 6796 (219.2) | 6174 (47.4)  | 4681 (179.5) | 6107 (200.8) |
|                                        | 2020       | 6970         | 6082        | 4902         | 3919         | 5003         | 6761         | 6086         | 4749         | 6082         |
| Critical limb ischemia                 | 2017–2019* | 3659 (367.0) | 3486 (78.3) | 3958 (44.5)  | 3645 (182.7) | 3684 (85.5)  | 3693 (131.9) | 3487 (170.4) | 2917 (75.8)  | 3073 (171.4) |
|                                        | 2020       | 4032         | 3616        | 3410         | 3334         | 3233         | 3526         | 3432         | 3063         | 3078         |
| Amputations                            | 2017–2019* | 845 (55.8)   | 798 (18.9)  | 897 (42.9)   | 867 (6.9)    | 845 (8.5)    | 869 (39.7)   | 893 (18.9)   | 787 (28.3)   | 740 (46.3)   |
|                                        | 2020       | 898          | 802         | 766          | 843          | 677          | 794          | 788          | 727          | 733          |

\* Mean of monthly hospitalization numbers for 2017 to 2019 (standard deviation)
